# Supplementary material
Source: MDPI journal article supplement (https://www.mdpi.com/1996-1073/16/6/2726)
Supplement: s1 [file s1]

# From secondary biomass to bio-methanol through CONVERGE technology: An environmental analysis

Stefan Cristian Galusnyak<sup>1</sup>, Letitia Petrescu<sup>1\*</sup>, Dora Andreea Chisalita<sup>1</sup>,

Calin-Cristian Cormos<sup>1</sup>, Marco Ugolini<sup>2</sup>

*1 - Babes - Bolyai University, Faculty of Chemistry and Chemical Engineering, 11 Arany*

*Janos, RO, 400028, Cluj - Napoca, Romania;*

*2 - CA.RE. FOR. Engineering, Italy;*

## Supplementary Material

The current document provides supplementary information in regards to the life cycle inventory tables for the environmental assessment section.

The data sets used in the life cycle inventory for each section of the investigated cases are further presented from Table S1 up to Table S5.

---

\* Corresponding author. Tel.: +40-264-593833, Fax: +40-264-590818  
Email address: letitia.petrescu@ubbcluj.ro

**Table S1.** Life cycle inventory for the main upstream processes in all CONVERGE scenarios (i.e., Case 1, Case 2, and Case 3)

| Process                                                        | Inputs                                       | Value                  | Unit                 | Outputs                                    | Value                | Unit                 |
|----------------------------------------------------------------|----------------------------------------------|------------------------|----------------------|--------------------------------------------|----------------------|----------------------|
| Biomass supply chain - Case 1 and Case 2 (woody biomass)       | Biomass (M50%) as forest residues            | 4.52×10 <sup>3</sup>   | kg/t <sub>MeOH</sub> | Biomass (M35%) as wood chips at plant gate | 3.48×10 <sup>3</sup> | kg/t <sub>MeOH</sub> |
|                                                                | Diesel for biomass preparation and transport | 18.15                  | kg/t <sub>MeOH</sub> | Biomass losses                             | 170.00               | kg/t <sub>MeOH</sub> |
| Biomass supply chain - Case 3 (exhausted olive pomace biomass) | Biomass as residues                          | 2.36×10 <sup>3</sup>   | kg/t <sub>MeOH</sub> | Biomass at plant gate                      | 2.34×10 <sup>3</sup> | kg/t <sub>MeOH</sub> |
|                                                                | Diesel for biomass transport                 | 4.25                   | kg/t <sub>MeOH</sub> | Biomass losses                             | 20                   | kg/t <sub>MeOH</sub> |
| Sorbent production & transportation (Case 1 – woody biomass)   | Calcium hydroxide                            | 6.40                   | kg/t <sub>MeOH</sub> | Sorbent                                    | 4.43                 | kg/t <sub>MeOH</sub> |
|                                                                | Aluminium hydroxide                          | 3.15                   | kg/t <sub>MeOH</sub> | Gaseous emissions                          | 0.887                | kg/t <sub>MeOH</sub> |
|                                                                | Polyvinyl Alcohol                            | 1.77                   | kg/t <sub>MeOH</sub> |                                            |                      |                      |
|                                                                | Electricity                                  | 1.02×10 <sup>3</sup>   | MJ/t <sub>MeOH</sub> |                                            |                      |                      |
|                                                                | Deionised water                              | 44.32                  | kg/t <sub>MeOH</sub> |                                            |                      |                      |
|                                                                | Diesel for transport                         | 37.07×10 <sup>-3</sup> | kg/t <sub>MeOH</sub> |                                            |                      |                      |
| Sorbent production & transportation (Case 2 – woody biomass)   | Calcium hydroxide                            | 4.67                   | kg/t <sub>MeOH</sub> | Sorbent                                    | 3.23                 | kg/t <sub>MeOH</sub> |
|                                                                | Aluminium hydroxide                          | 2.29                   | kg/t <sub>MeOH</sub> | Gaseous emissions                          | 0.65                 | kg/t <sub>MeOH</sub> |
|                                                                | Polyvinyl Alcohol                            | 1.29                   | kg/t <sub>MeOH</sub> |                                            |                      |                      |
|                                                                | Electricity                                  | 746.63                 | MJ/t <sub>MeOH</sub> |                                            |                      |                      |

|                                                                          |                          |                          |                        |                      |                   |                           |
|--------------------------------------------------------------------------|--------------------------|--------------------------|------------------------|----------------------|-------------------|---------------------------|
|                                                                          |                          | Deionised water          | 32.33                  | kg/t <sub>MeOH</sub> |                   |                           |
|                                                                          |                          | Diesel for transport     | 27.04×10 <sup>-3</sup> | kg/t <sub>MeOH</sub> |                   |                           |
| Sorbent production & transportation<br>(Case 3 – exhausted olive pomace) |                          | Calcium hydroxide        | 4.60                   | kg/t <sub>MeOH</sub> | Sorbent           | 3.18 kg/t <sub>MeOH</sub> |
|                                                                          |                          | Aluminium hydroxide      | 2.26                   | kg/t <sub>MeOH</sub> | Gaseous emissions | 0.64 kg/t <sub>MeOH</sub> |
|                                                                          |                          | Polyvinyl Alcohol        | 1.27                   | kg/t <sub>MeOH</sub> |                   |                           |
|                                                                          |                          | Electricity              | 735.26                 | MJ/t <sub>MeOH</sub> |                   |                           |
|                                                                          |                          | Deionised water          | 31.84                  | kg/t <sub>MeOH</sub> |                   |                           |
|                                                                          |                          | Diesel for transport     | 26.63×10 <sup>-3</sup> | kg/t <sub>MeOH</sub> |                   |                           |
|                                                                          |                          |                          |                        |                      |                   |                           |
| Membrane production & transportation<br>(Case 1, Case 2 and Case 3)      | Ceramic membrane support | Clay                     | 6.30×10 <sup>-2</sup>  | kg                   | Membrane support  | 0.16 kg                   |
|                                                                          |                          | Marble dust              | 3.15×10 <sup>-2</sup>  | kg                   |                   |                           |
|                                                                          |                          | Fired tile scraps        | 3.15×10 <sup>-2</sup>  | kg                   |                   |                           |
|                                                                          |                          | Olive stone              | 3.15×10 <sup>-2</sup>  | kg                   |                   |                           |
|                                                                          |                          | Water                    | 5.04×10 <sup>-2</sup>  | kg                   |                   |                           |
|                                                                          |                          | Diesel for transport     | 9.09×10 <sup>-3</sup>  | kg                   |                   |                           |
|                                                                          |                          | Heavy fuel for transport | 1.98×10 <sup>-4</sup>  | kg                   |                   |                           |
|                                                                          |                          | Electricity              | 8.02×10 <sup>-2</sup>  | MJ                   |                   |                           |
|                                                                          | Membrane coating         | Membrane support         | 0.16                   | kg                   | Membrane          | 0.16 kg                   |
|                                                                          |                          | Aluminium oxide          | 1.83×10 <sup>-4</sup>  | kg                   |                   |                           |

|                        |                       |    |
|------------------------|-----------------------|----|
| Polyimide              | $2.19 \times 10^{-8}$ | kg |
| Polyether ether ketone | $2.19 \times 10^{-8}$ | kg |
| n-Methylpyrrolidone    | $4.16 \times 10^{-7}$ | kg |
| Electricity            | 0.97                  | MJ |

**Table S2.** Life cycle inventory for the main processes in Case 1

| Main process       | Sub-process          | Inputs                  | Values               | Units                | Outputs                              | Values                | Units                |
|--------------------|----------------------|-------------------------|----------------------|----------------------|--------------------------------------|-----------------------|----------------------|
| Biomass conversion | Drying               | Biomass wet             | 4.02×10 <sup>3</sup> | kg/t <sub>MeOH</sub> | Biomass dried                        | 2.91×10 <sup>3</sup>  | kg/t <sub>MeOH</sub> |
|                    |                      | Air                     | 3.01×10 <sup>3</sup> | kg/t <sub>MeOH</sub> | Used air                             | 3.01×10 <sup>3</sup>  | kg/t <sub>MeOH</sub> |
|                    |                      | Heat                    | 3.29×10 <sup>3</sup> | MJ/t <sub>MeOH</sub> | Moisture evaporated                  | 1.12×10 <sup>3</sup>  | kg/t <sub>MeOH</sub> |
|                    | MILENA & Tar removal | Biomass dried           | 2.91×10 <sup>3</sup> | kg/t <sub>MeOH</sub> | Syngas to SER                        | 3.09×10 <sup>3</sup>  | kg/t <sub>MeOH</sub> |
|                    |                      | Air                     | 3.24×10 <sup>3</sup> | kg/t <sub>MeOH</sub> | Flue gases                           | 4.21×10 <sup>3</sup>  | kg/t <sub>MeOH</sub> |
|                    |                      | Steam                   | 3.06×10 <sup>3</sup> | kg/t <sub>MeOH</sub> | H <sub>2</sub> O                     | 145.33                | kg/t <sub>MeOH</sub> |
|                    |                      | Olivine make-up         | 868.28               | kg/t <sub>MeOH</sub> | CO <sub>2</sub>                      | 963.15                | kg/t <sub>MeOH</sub> |
|                    |                      | Electricity for blowers | 137.77               | MJ/t <sub>MeOH</sub> | O <sub>2</sub>                       | 133.94                | kg/t <sub>MeOH</sub> |
|                    |                      | Gas carrier             | 308.85               | kg/t <sub>MeOH</sub> | Ar                                   | 49.67                 | kg/t <sub>MeOH</sub> |
|                    |                      | Off-gas                 | 93.77                | kg/t <sub>MeOH</sub> | N <sub>2</sub>                       | 2.91×10 <sup>3</sup>  | kg/t <sub>MeOH</sub> |
|                    |                      |                         |                      |                      | CO                                   | 7.51×10 <sup>-6</sup> | kg/t <sub>MeOH</sub> |
|                    |                      |                         |                      |                      | Ash (purge)                          | 1.69                  | kg/t <sub>MeOH</sub> |
|                    |                      |                         |                      |                      | Olivine (purge)                      | 895.44                | kg/t <sub>MeOH</sub> |
|                    |                      |                         |                      |                      | BTX                                  | 107.60                | kg/t <sub>MeOH</sub> |
| SER & Compression  | SER                  | Air                     | 4.95×10 <sup>3</sup> | kg/t <sub>MeOH</sub> | CO <sub>2</sub> to compression       | 3.62×10 <sup>3</sup>  | kg/t <sub>MeOH</sub> |
|                    |                      | Steam                   | 3.06×10 <sup>3</sup> | kg/t <sub>MeOH</sub> | H <sub>2</sub> stream to compression | 309.49                | kg/t <sub>MeOH</sub> |

|                    |                                                   |                                         |                      |                      |                         |                       |                      |
|--------------------|---------------------------------------------------|-----------------------------------------|----------------------|----------------------|-------------------------|-----------------------|----------------------|
|                    |                                                   | CO <sub>2</sub>                         | 2.49×10 <sup>3</sup> | kg/t <sub>MeOH</sub> | Flue gases              | 5.68×10 <sup>3</sup>  | kg/t <sub>MeOH</sub> |
|                    |                                                   | CO                                      | 416.12               | kg/t <sub>MeOH</sub> | N <sub>2</sub>          | 3.77×10 <sup>3</sup>  | kg/t <sub>MeOH</sub> |
|                    |                                                   | CH <sub>4</sub>                         | 271.55               | kg/t <sub>MeOH</sub> | H <sub>2</sub> O        | 975.44                | kg/t <sub>MeOH</sub> |
|                    |                                                   | H <sub>2</sub>                          | 202.79               | kg/t <sub>MeOH</sub> | CO <sub>2</sub>         | 661.07                | kg/t <sub>MeOH</sub> |
|                    |                                                   | H <sub>2</sub> O                        | 198.80               | kg/t <sub>MeOH</sub> | O <sub>2</sub>          | 207.09                | kg/t <sub>MeOH</sub> |
|                    |                                                   | C <sub>2</sub> H <sub>4</sub>           | 173.13               | kg/t <sub>MeOH</sub> | Ar                      | 64.18                 | kg/t <sub>MeOH</sub> |
|                    |                                                   | N <sub>2</sub>                          | 64.02                | kg/t <sub>MeOH</sub> | CO                      | 5.59×10 <sup>-6</sup> | kg/t <sub>MeOH</sub> |
|                    |                                                   | O <sub>2</sub>                          | 25.23                | kg/t <sub>MeOH</sub> | H <sub>2</sub>          | 1.30×10 <sup>-6</sup> | kg/t <sub>MeOH</sub> |
|                    |                                                   | MeOH                                    | 2.04                 | kg/t <sub>MeOH</sub> |                         |                       |                      |
|                    |                                                   | Ar                                      | 0.78                 | kg/t <sub>MeOH</sub> |                         |                       |                      |
|                    |                                                   | Electricity                             | 1.22×10 <sup>3</sup> | MJ/t <sub>MeOH</sub> |                         |                       |                      |
|                    |                                                   |                                         |                      |                      |                         |                       |                      |
|                    |                                                   |                                         |                      |                      |                         |                       |                      |
|                    | CO <sub>2</sub> and H <sub>2</sub><br>compression | CO <sub>2</sub> to compression          | 3.62×10 <sup>3</sup> | kg/t <sub>MeOH</sub> | CO <sub>2</sub> to MeOH | 1.96×10 <sup>3</sup>  | kg/t <sub>MeOH</sub> |
|                    |                                                   | H <sub>2</sub> stream to<br>compression | 309.49               | kg/t <sub>MeOH</sub> | H <sub>2</sub> to MeOH  | 278.54                | kg/t <sub>MeOH</sub> |
|                    |                                                   | Electricity                             | 5.84×10 <sup>3</sup> | MJ/t <sub>MeOH</sub> | Waste water             | 531.91                | kg/t <sub>MeOH</sub> |
|                    |                                                   |                                         |                      |                      | Off-gas                 | 244.44                | kg/t <sub>MeOH</sub> |
| Methanol synthesis | MeOH production                                   | CO <sub>2</sub> to MeOH                 | 1.96×10 <sup>3</sup> | kg/t <sub>MeOH</sub> | Methanol product        | 1×10 <sup>3</sup>     | kg                   |
|                    |                                                   | H <sub>2</sub> to MeOH                  | 278.54               | kg/t <sub>MeOH</sub> | Waste water             | 724.75                | kg/t <sub>MeOH</sub> |
|                    |                                                   | Water                                   | 83.13                | kg/t <sub>MeOH</sub> | Off-gas                 | 691.13                | kg/t <sub>MeOH</sub> |

**Table S3.** Life cycle inventory for the main processes in Case 2

| Main process       | Sub-process          | Inputs                  | Values               | Units                | Outputs                        | Values                | Units                |
|--------------------|----------------------|-------------------------|----------------------|----------------------|--------------------------------|-----------------------|----------------------|
| Biomass conversion | Drying               | Biomass wet             | 3.49×10 <sup>3</sup> | kg/t <sub>MeOH</sub> | Biomass dried                  | 2.52×10 <sup>3</sup>  | kg/t <sub>MeOH</sub> |
|                    |                      | Air                     | 2.61×10 <sup>3</sup> | kg/t <sub>MeOH</sub> | Used air                       | 2.61×10 <sup>3</sup>  | kg/t <sub>MeOH</sub> |
|                    |                      | Heat                    | 2.86×10 <sup>3</sup> | MJ/t <sub>MeOH</sub> | Moisture evaporated            | 969.15                | kg/t <sub>MeOH</sub> |
|                    | MILENA & Tar removal | Biomass dried           | 2.52×10 <sup>3</sup> | kg/t <sub>MeOH</sub> | Syngas to SER                  | 2.68×10 <sup>3</sup>  | kg/t <sub>MeOH</sub> |
|                    |                      | Air                     | 2.81×10 <sup>3</sup> | kg/t <sub>MeOH</sub> | Flue gases                     | 3.69×10 <sup>3</sup>  | kg/t <sub>MeOH</sub> |
|                    |                      | Steam                   | 133.34               | kg/t <sub>MeOH</sub> | H <sub>2</sub> O               | 107.79                | kg/t <sub>MeOH</sub> |
|                    |                      | Olivine make-up         | 753.14               | kg/t <sub>MeOH</sub> | CO <sub>2</sub>                | 866.40                | kg/t <sub>MeOH</sub> |
|                    |                      | Electricity for blowers | 119.50               | MJ/t <sub>MeOH</sub> | O <sub>2</sub>                 | 117.21                | kg/t <sub>MeOH</sub> |
|                    |                      | Gas carrier             | 267.91               | kg/t <sub>MeOH</sub> | Ar                             | 43.72                 | kg/t <sub>MeOH</sub> |
|                    |                      | Off-gas                 | 85.65                | kg/t <sub>MeOH</sub> | N <sub>2</sub>                 | 2.56×10 <sup>3</sup>  | kg/t <sub>MeOH</sub> |
|                    |                      |                         |                      |                      | CO                             | 7.53×10 <sup>-6</sup> | kg/t <sub>MeOH</sub> |
|                    |                      |                         |                      |                      | Ash (purge)                    | 1.47                  | kg/t <sub>MeOH</sub> |
|                    |                      |                         |                      |                      | Olivine (purge)                | 776.70                | kg/t <sub>MeOH</sub> |
|                    |                      |                         |                      |                      | BTX                            | 93.33                 | kg/t <sub>MeOH</sub> |
|                    |                      |                         |                      |                      | Waste water                    | 2.44×10 <sup>3</sup>  | kg/t <sub>MeOH</sub> |
| SER & Compression  | SER                  | Air                     | 3.13×10 <sup>3</sup> | kg/t <sub>MeOH</sub> | CO <sub>2</sub> to compression | 3.58×10 <sup>3</sup>  | kg/t <sub>MeOH</sub> |

|                    |                                                   |                                      |                      |                      |                                      |                       |                      |
|--------------------|---------------------------------------------------|--------------------------------------|----------------------|----------------------|--------------------------------------|-----------------------|----------------------|
|                    |                                                   | Steam                                | 2.41×10 <sup>3</sup> | kg/t <sub>MeOH</sub> | H <sub>2</sub> stream to compression | 225.75                | kg/t <sub>MeOH</sub> |
|                    |                                                   | CO <sub>2</sub>                      | 2.09×10 <sup>3</sup> | kg/t <sub>MeOH</sub> | Waste water                          | 1.25×10 <sup>3</sup>  | kg/t <sub>MeOH</sub> |
|                    |                                                   | CO                                   | 347.46               | kg/t <sub>MeOH</sub> | Flue gases                           | 3.58×10 <sup>3</sup>  | kg/t <sub>MeOH</sub> |
|                    |                                                   | CH <sub>4</sub>                      | 331.43               | kg/t <sub>MeOH</sub> | N <sub>2</sub>                       | 2.39×10 <sup>3</sup>  | kg/t <sub>MeOH</sub> |
|                    |                                                   | H <sub>2</sub>                       | 127.49               | kg/t <sub>MeOH</sub> | H <sub>2</sub> O                     | 476.59                | kg/t <sub>MeOH</sub> |
|                    |                                                   | H <sub>2</sub> O                     | 164.53               | kg/t <sub>MeOH</sub> | CO <sub>2</sub>                      | 548.36                | kg/t <sub>MeOH</sub> |
|                    |                                                   | C <sub>2</sub> H <sub>4</sub>        | 150.17               | kg/t <sub>MeOH</sub> | O <sub>2</sub>                       | 121.95                | kg/t <sub>MeOH</sub> |
|                    |                                                   | N <sub>2</sub>                       | 63.98                | kg/t <sub>MeOH</sub> | Ar                                   | 40.65                 | kg/t <sub>MeOH</sub> |
|                    |                                                   | O <sub>2</sub>                       | 14.40                | kg/t <sub>MeOH</sub> | CO                                   | 4.72×10 <sup>-6</sup> | kg/t <sub>MeOH</sub> |
|                    |                                                   | MeOH                                 | 0.70                 | kg/t <sub>MeOH</sub> | H <sub>2</sub>                       | 6.46×10 <sup>-7</sup> | kg/t <sub>MeOH</sub> |
|                    |                                                   | Ar                                   | 0.78                 | kg/t <sub>MeOH</sub> |                                      |                       |                      |
|                    |                                                   | Off-gas                              | 592.65               | kg/t <sub>MeOH</sub> |                                      |                       |                      |
|                    |                                                   | Electricity                          | 961.95               | MJ/t <sub>MeOH</sub> |                                      |                       |                      |
|                    | CO <sub>2</sub> and H <sub>2</sub><br>compression | CO <sub>2</sub> to compression       | 3.58×10 <sup>3</sup> | kg/t <sub>MeOH</sub> | CO <sub>2</sub> to MeOH              | 1.43×10 <sup>3</sup>  | kg/t <sub>MeOH</sub> |
|                    |                                                   | H <sub>2</sub> stream to compression | 225.75               | kg/t <sub>MeOH</sub> | H <sub>2</sub> to MeOH               | 203.18                | kg/t <sub>MeOH</sub> |
|                    |                                                   | Electricity                          | 4.55×10 <sup>3</sup> | MJ/t <sub>MeOH</sub> | Waste water                          | 451.73                | kg/t <sub>MeOH</sub> |
|                    |                                                   |                                      |                      |                      | Off-gas                              | 589.58                | kg/t <sub>MeOH</sub> |
| Methanol synthesis | MeOH production                                   | CO <sub>2</sub> to MeOH              | 1.43×10 <sup>3</sup> | kg/t <sub>MeOH</sub> | Methanol product                     | 1×10 <sup>3</sup>     | kg                   |



|                        |        |                      |             |        |                      |
|------------------------|--------|----------------------|-------------|--------|----------------------|
| H <sub>2</sub> to MeOH | 203.18 | kg/t <sub>MeOH</sub> | Waste water | 628.64 | kg/t <sub>MeOH</sub> |
| Water                  | 60.64  | kg/t <sub>MeOH</sub> | Off-gas     | 88.47  | kg/t <sub>MeOH</sub> |
| Electricity            | 744.79 | MJ/t <sub>MeOH</sub> |             |        |                      |

**Table S4.** Life cycle inventory for the main processes in Case 3

| Main process       | Sub-process          | Inputs                  | Values               | Units                | Outputs                        | Values                | Units                |
|--------------------|----------------------|-------------------------|----------------------|----------------------|--------------------------------|-----------------------|----------------------|
| Biomass conversion | Drying               | Biomass wet             | 2.35×10 <sup>3</sup> | kg/t <sub>MeOH</sub> | Biomass dried                  | 2.28×10 <sup>3</sup>  | kg/t <sub>MeOH</sub> |
|                    |                      | Air                     | 182.82               | kg/t <sub>MeOH</sub> | Used air                       | 182.82                | kg/t <sub>MeOH</sub> |
|                    |                      | Heat                    | 404.17               | MJ/t <sub>MeOH</sub> | Moisture evaporated            | 67.77                 | kg/t <sub>MeOH</sub> |
|                    | MILENA & Tar removal | Biomass dried           | 2.67×10 <sup>3</sup> | kg/t <sub>MeOH</sub> | Syngas to SER                  | 3.28×10 <sup>3</sup>  | kg/t <sub>MeOH</sub> |
|                    |                      | Air                     | 5.34×10 <sup>3</sup> | kg/t <sub>MeOH</sub> | Flue gases                     | 6.51×10 <sup>3</sup>  | kg/t <sub>MeOH</sub> |
|                    |                      | Steam                   | 127.35               | kg/t <sub>MeOH</sub> | H <sub>2</sub> O               | 332.23                | kg/t <sub>MeOH</sub> |
|                    |                      | Olivine make-up         | 1.27×10 <sup>3</sup> | kg/t <sub>MeOH</sub> | CO <sub>2</sub>                | 1.45×10 <sup>3</sup>  | kg/t <sub>MeOH</sub> |
|                    |                      | Electricity for blowers | 237.60               | MJ/t <sub>MeOH</sub> | O <sub>2</sub>                 | 213.84                | kg/t <sub>MeOH</sub> |
|                    |                      | Gas carrier             | 316.46               | kg/t <sub>MeOH</sub> | Ar                             | 75.50                 | kg/t <sub>MeOH</sub> |
|                    |                      | Off-gas                 | 88.26                | kg/t <sub>MeOH</sub> | N <sub>2</sub>                 | 4.44×10 <sup>3</sup>  | kg/t <sub>MeOH</sub> |
|                    |                      |                         |                      |                      | CO                             | 1.17×10 <sup>-5</sup> | kg/t <sub>MeOH</sub> |
|                    |                      |                         |                      |                      | Ash (purge)                    | 6.35                  | kg/t <sub>MeOH</sub> |
|                    |                      |                         |                      |                      | Olivine (purge)                | 1.39×10 <sup>3</sup>  | kg/t <sub>MeOH</sub> |
|                    |                      |                         |                      |                      | BTX                            | 84.39                 | kg/t <sub>MeOH</sub> |
|                    |                      |                         |                      |                      | Waste water                    | 2.29×10 <sup>3</sup>  | kg/t <sub>MeOH</sub> |
| SER & Compression  | SER                  | Air                     | 2.94×10 <sup>3</sup> | kg/t <sub>MeOH</sub> | CO <sub>2</sub> to compression | 2.44×10 <sup>3</sup>  | kg/t <sub>MeOH</sub> |

|                    |                                                   |                                      |                      |                      |                                      |                       |                      |
|--------------------|---------------------------------------------------|--------------------------------------|----------------------|----------------------|--------------------------------------|-----------------------|----------------------|
|                    |                                                   | Steam                                | 2.33×10 <sup>3</sup> | kg/t <sub>MeOH</sub> | H <sub>2</sub> stream to compression | 222.32                | kg/t <sub>MeOH</sub> |
|                    |                                                   | CO <sub>2</sub>                      | 1.89×10 <sup>3</sup> | kg/t <sub>MeOH</sub> | Waste water                          | 1.17×10 <sup>3</sup>  | kg/t <sub>MeOH</sub> |
|                    |                                                   | CO                                   | 371.73               | kg/t <sub>MeOH</sub> | Flue gases                           | 3.45×10 <sup>3</sup>  | kg/t <sub>MeOH</sub> |
|                    |                                                   | CH <sub>4</sub>                      | 309.46               | kg/t <sub>MeOH</sub> | N <sub>2</sub>                       | 2.32×10 <sup>3</sup>  | kg/t <sub>MeOH</sub> |
|                    |                                                   | H <sub>2</sub>                       | 133.16               | kg/t <sub>MeOH</sub> | H <sub>2</sub> O                     | 447.01                | kg/t <sub>MeOH</sub> |
|                    |                                                   | H <sub>2</sub> O                     | 166.48               | kg/t <sub>MeOH</sub> | CO <sub>2</sub>                      | 524.31                | kg/t <sub>MeOH</sub> |
|                    |                                                   | C <sub>2</sub> H <sub>4</sub>        | 135.78               | kg/t <sub>MeOH</sub> | O <sub>2</sub>                       | 118.06                | kg/t <sub>MeOH</sub> |
|                    |                                                   | N <sub>2</sub>                       | 175.26               | kg/t <sub>MeOH</sub> | Ar                                   | 38.92                 | kg/t <sub>MeOH</sub> |
|                    |                                                   | O <sub>2</sub>                       | 13.43                | kg/t <sub>MeOH</sub> | CO                                   | 4.49×10 <sup>-6</sup> | kg/t <sub>MeOH</sub> |
|                    |                                                   | MeOH                                 | 0.53                 | kg/t <sub>MeOH</sub> | H <sub>2</sub>                       | 6.04×10 <sup>-7</sup> | kg/t <sub>MeOH</sub> |
|                    |                                                   | Ar                                   | 1.48                 | kg/t <sub>MeOH</sub> |                                      |                       |                      |
|                    |                                                   | Off-gas                              | 822.37               | kg/t <sub>MeOH</sub> |                                      |                       |                      |
|                    |                                                   | Electricity                          | 969.21               | MJ/t <sub>MeOH</sub> |                                      |                       |                      |
|                    | CO <sub>2</sub> and H <sub>2</sub><br>compression | CO <sub>2</sub> to compression       | 2.44×10 <sup>3</sup> | kg/t <sub>MeOH</sub> | CO <sub>2</sub> to MeOH              | 1.41×10 <sup>3</sup>  | kg/t <sub>MeOH</sub> |
|                    |                                                   | H <sub>2</sub> stream to compression | 222.32               | kg/t <sub>MeOH</sub> | H <sub>2</sub> to MeOH               | 200.09                | kg/t <sub>MeOH</sub> |
|                    |                                                   | Electricity                          | 4.37×10 <sup>3</sup> | MJ/t <sub>MeOH</sub> | Waste water                          | 423.43                | kg/t <sub>MeOH</sub> |
|                    |                                                   |                                      |                      |                      | Off-gas                              | 821.43                | kg/t <sub>MeOH</sub> |
| Methanol synthesis | MeOH production                                   | CO <sub>2</sub> to MeOH              | 1.41×10 <sup>3</sup> | kg/t <sub>MeOH</sub> | Methanol product                     | 1×10 <sup>3</sup>     | kg                   |

|                        |        |                      |             |        |                      |
|------------------------|--------|----------------------|-------------|--------|----------------------|
| H <sub>2</sub> to MeOH | 200.09 | kg/t <sub>MeOH</sub> | Waste water | 628.54 | kg/t <sub>MeOH</sub> |
| Water                  | 59.72  | kg/t <sub>MeOH</sub> | Off-gas     | 62.29  | kg/t <sub>MeOH</sub> |
| Electricity            | 820.58 | MJ/t <sub>MeOH</sub> |             |        |                      |

**Table S5.** Life cycle inventory for the downstream processes in all CONVERGE scenarios (i.e., Case 1, Case 2, and Case 3)

| Process                                           | Inputs               | Value                 | Unit                 | Outputs             | Value | Unit                 |
|---------------------------------------------------|----------------------|-----------------------|----------------------|---------------------|-------|----------------------|
| Ash disposal<br>(Case 1 – woody biomass)          | Ash                  | 1.69                  | kg/t <sub>MeOH</sub> | Ash to cement plant | 1.69  | kg/t <sub>MeOH</sub> |
|                                                   | Diesel for transport | 1.24*10 <sup>-3</sup> | kg/t <sub>MeOH</sub> |                     |       |                      |
| Ash disposal<br>(Case 2 – woody biomass)          | Ash                  | 1.47                  | kg/t <sub>MeOH</sub> | Ash to cement plant | 1.47  | kg/t <sub>MeOH</sub> |
|                                                   | Diesel for transport | 1.07*10 <sup>-3</sup> | kg/t <sub>MeOH</sub> |                     |       |                      |
| Ash disposal<br>(Case 3 – exhausted olive pomace) | Ash                  | 6.35                  | kg/t <sub>MeOH</sub> | Ash to cement plant | 6.35  | kg/t <sub>MeOH</sub> |
|                                                   | Diesel for transport | 4.63*10 <sup>-3</sup> | kg/t <sub>MeOH</sub> |                     |       |                      |
